# Supplementary material
Source: MDPI journal article supplement (https://www.mdpi.com/2311-5629/9/4/118)
Supplement: s1 [file s1]

# Fabrication of Gold Nanoparticles Embedded Laser-Induced Graphene (LIG) Electrode for Hydrogen Evolution Reaction

Deepak Deepak <sup>1,†</sup>, Vennela Vuruputuri <sup>1,†</sup>, Gourav Bhattacharya <sup>2,\*</sup>, James A. McLaughlin <sup>2</sup> and Susanta Sinha Roy <sup>1,\*</sup>

<sup>1</sup> Department of Physics, School of Natural Sciences, Shiv Nadar Institution of Eminence (SNIOE), Delhi-NCR, Greater Noida 201314, India; dd119@snu.edu.in (D.D.); vv652@snu.edu.in (V.V.)

<sup>2</sup> Nanotechnology and Integrated Bioengineering Centre, School of Engineering, Ulster University, Belfast BT15 1AP, UK; jad.mclaughlin@ulster.ac.uk

\* Correspondence: g.bhattacharyasusanta.roy@snu.edu.in or g.bhattacharya@ulster.ac.uk (G.B.); susanta.roy@snu.edu.in (S.S.R.)

† These authors contribute equally to this work.

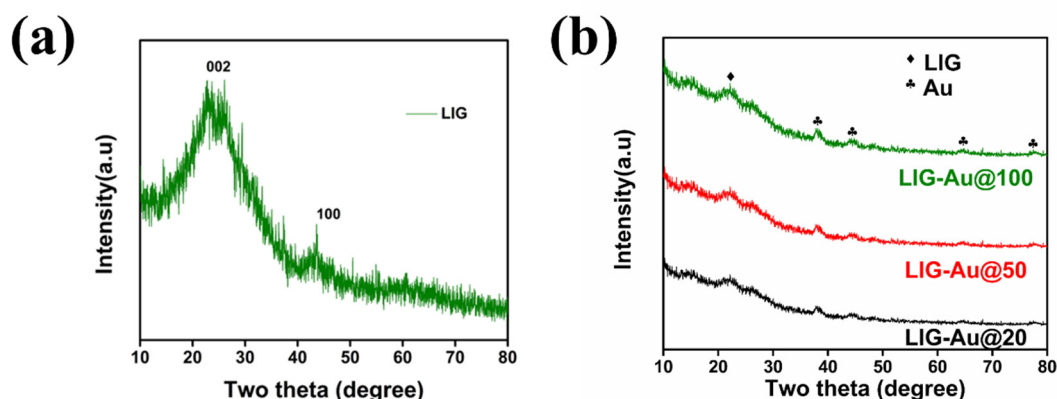

**Figure S1** (a)&(b) shows the XRD pattern of bare LIG and as-prepared LIG-Au hybrids respectively.

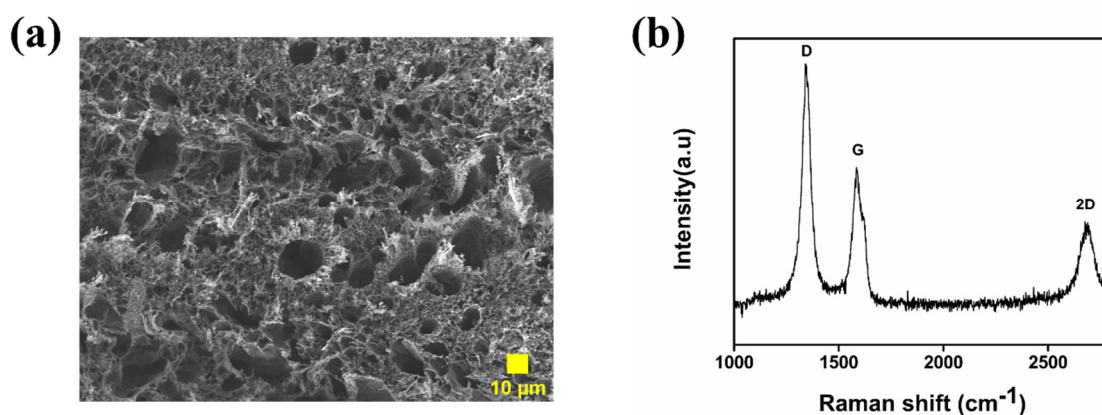

**Figure S2** (a) represents FESEM of bare LIG (b) Raman spectra depicting D, G and 2D peaks of LIG.

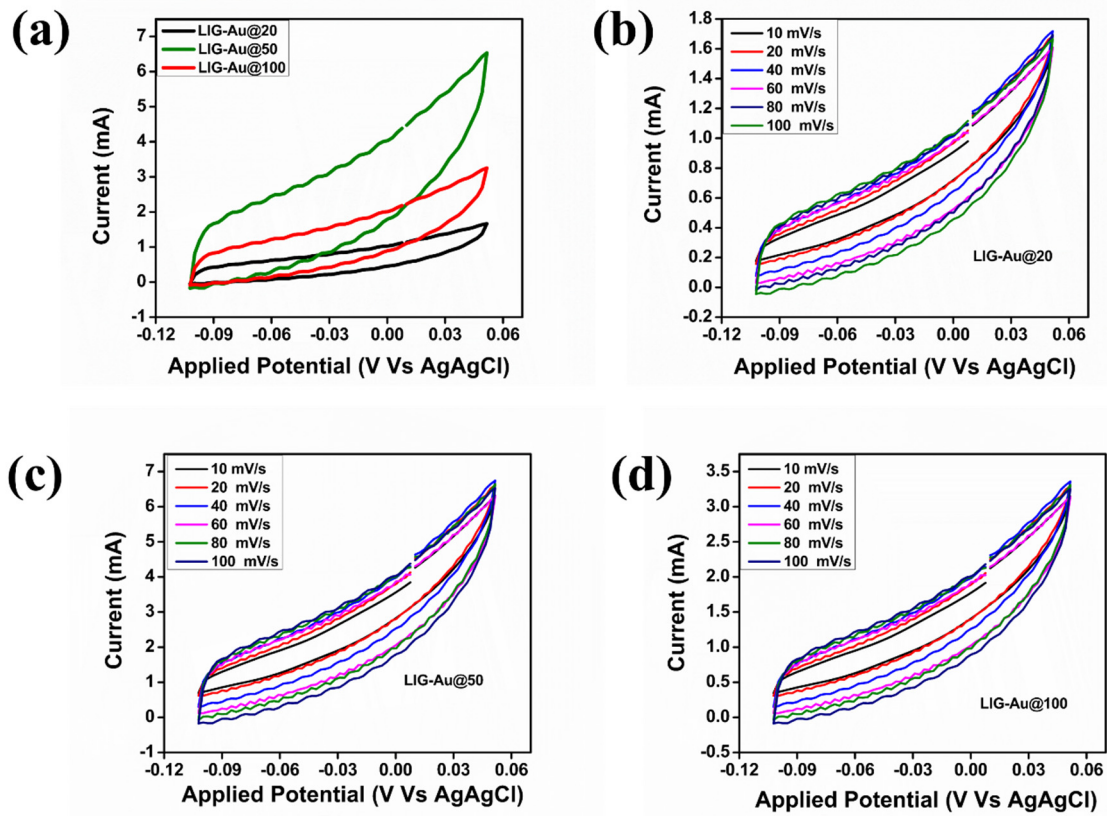

**Figure S3** (a) shows the CV scan in the non-faradic region to calculate the double layer capacitance in 0.5M  $\text{H}_2\text{SO}_4$  solution. (b-d) represents the individual CV scans in the same regions for all LIG-Au nanostructures.

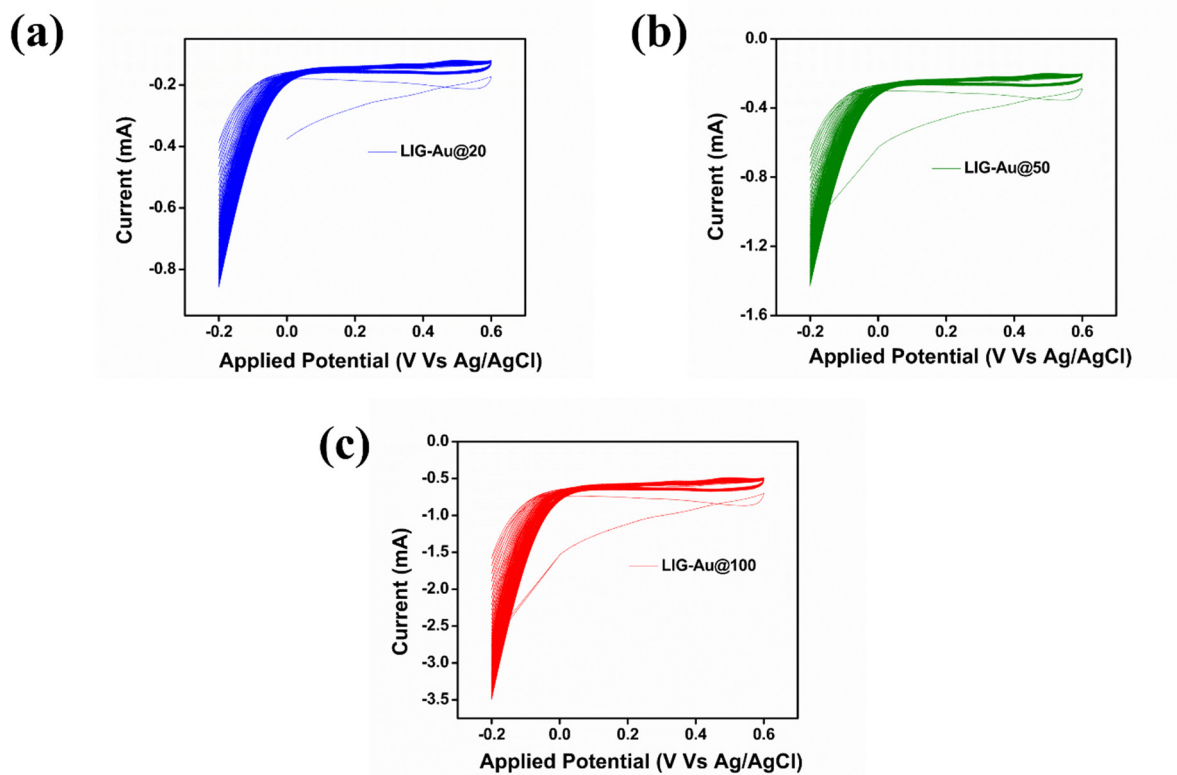

**Figure S4** represents the CV scans of bare LIG in  $\text{HAuCl}_4$  and  $\text{H}_2\text{SO}_4$  solution during the electrodeposition process at different cycles.

Dry weight measurements to calculate the exact amount of gold content.

Weight of bare LIG = 20.5mg

Weight of bare LIG-Au@20 = 21.7 mg

Weight of bare LIG-Au@50 = 22.8 mg

Weight of LIG-Au@100 = 24.6 mg

The exact weights of LIG-Au@20,50 & 100 are 1.2 mg, 2.3 mg, and 4.1 mg respectively which is approximately consistent with the loading cycles ratio.

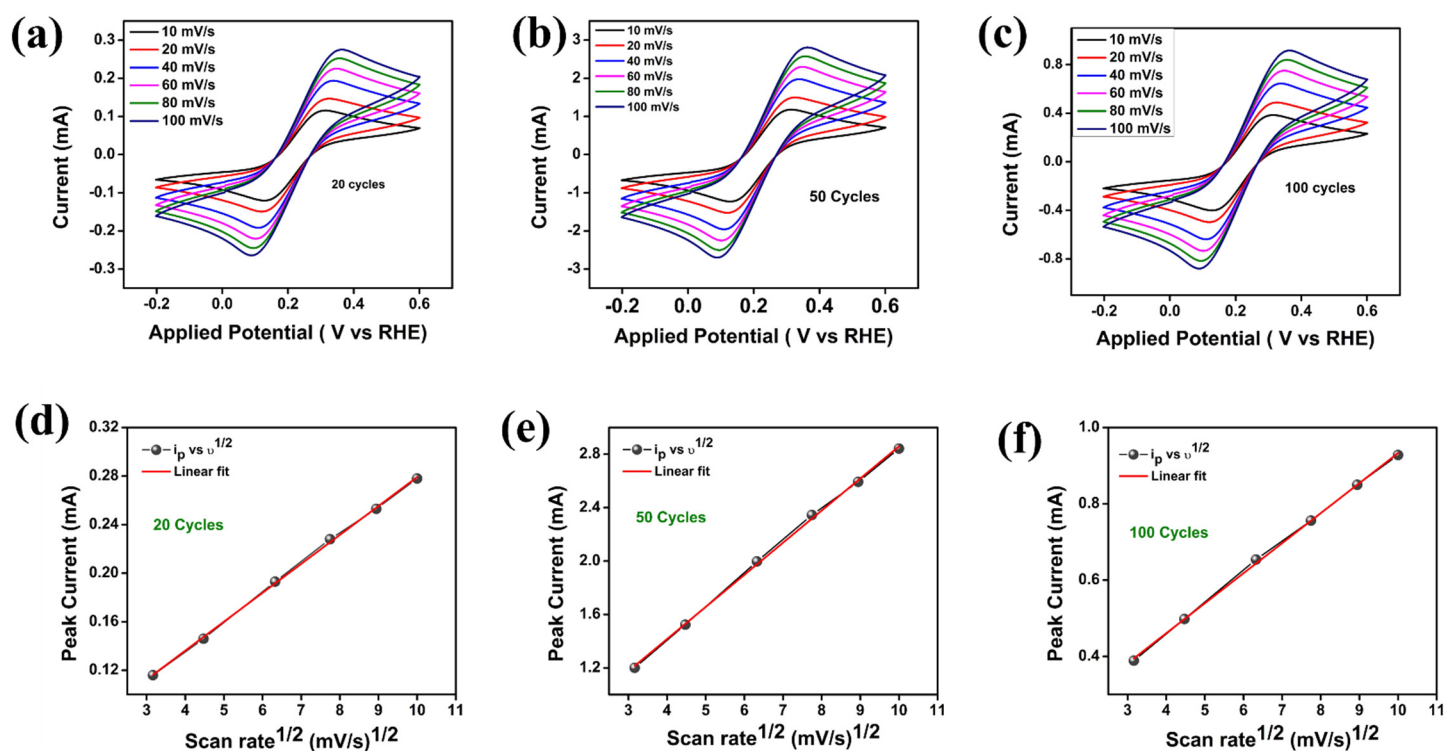

**Figure S5** Cyclic Voltammetry studies of LIG-Au nanostructures in the presence of 5mM Ferro/Ferricyanide + 0.1M KCl.

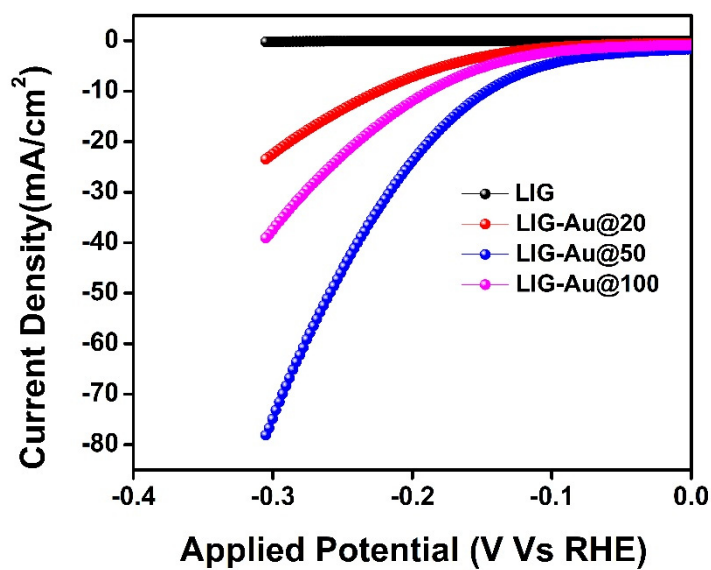

**Figure S6** LSV scans at 2 mV/s.

Table S1 shows the TOF values for comparison of **LIG-Au@50** with other similar catalysis.

| <b>Catalysis</b>                | <b>TOF (s<sup>-1</sup>)</b> | <b>Reference</b> |
|---------------------------------|-----------------------------|------------------|
| SnCl <sub>2</sub>               | 0.0048                      | [1]              |
| ZnCl <sub>2</sub>               | 0.0028                      | [1]              |
| Au <sub>3</sub> Ag <sub>1</sub> | 5.4 × (10 <sup>-13</sup> )  | [2]              |
| Au <sub>2</sub> Ag <sub>1</sub> | 5.6 × (10 <sup>-13</sup> )  | [2]              |
| Au                              | 4.4 × (10 <sup>-13</sup> )  | [2]              |
| <b>LIG-Au@50</b>                | <b>0.0091</b>               | <b>This work</b> |

#### References:

1. Aguas, I.; Alarcón, E.; Villa, A.L. Turpentine Valorization by Its Oxyfunctionalization to Nopol through Heterogeneous Catalysis. *Heliyon* **2020**, *6*, doi:10.1016/j.heliyon.2020.e03887.
2. Masoud, N.; Delannoy, L.; Calers, C.; Gallet, J.J.; Bournel, F.; de Jong, K.P.; Louis, C.; de Jongh, P.E. Silica-Supported Au–Ag Catalysts for the Selective Hydrogenation of Butadiene. *ChemCatChem* **2017**, *9*, 2418–2425, doi:10.1002/cctc.201700127.
